# Supplementary material for: KBase: The United States Department of Energy Systems Biology Knowledgebase
Source: PubMed Central journal article supplement (PMC6870991; doi:10.1038/nbt.4163), 2018-07-06
Supplement: 41587_2018_BFnbt4163_MOESM12_ESM.pdf [file 41587_2018_BFnbt4163_MOESM12_ESM.pdf]

## 1 Supplementary Notes

### 3 Supplementary Note 1. Examples of Use of KBase Infrastructure and 4 Tools

6 The KBase platform has been utilized by a variety of scientific groups, with citations in over 30  
7 peer-reviewed publications. These publications cover a range of topics and demonstrate the  
8 novel ways scientists are applying tools within KBase to their research. Several of these studies  
9 have publicly shared KBase Narratives associated with them. These serve as a mechanism to  
10 show how the KBase platform was applied to perform the described work as well as a means of  
11 releasing the data produced in the published analysis. The KBase website maintains a curated  
12 list of published Narratives at <http://www.kbase.us/narrative-library/>. Here we will review a  
13 selection of these research Narratives that demonstrate many (but not all) of the workflows and  
14 capabilities available in the KBase platform (see Figure 2 in the main manuscript).

#### 15 1A. Reconstruction of 8000 Models of Core Metabolism Across the 16 Microbial Tree of Life

17 Link: <https://narrative.kbase.us/narrative/ws.20186.obj.18>

18  
19 In a recent publication in *BMC Genomics*<sup>1</sup> researchers developed a framework in KBase to  
20 reconstruct and analyze core metabolic models (CMMs). Core metabolic models representing  
21 48 major phylogenetic microbial groups were constructed based on a core model template  
22 consisting of a highly curated set of biochemical reactions derived from a diverse set of model  
23 organisms, and about 200 unique reactions were selected from this set, comprising 12 key  
24 energy biosynthesis pathways linked to central metabolism and variations of bacterial electron  
25 transport chains. This framework was applied in KBase to build core models for over 8000  
26 prokaryotic genomes that span the prokaryotic tree of life. The authors used CMMs to  
27 determine: (i) accurate ATP yields based on different growth/environmental conditions; (ii) ETC  
28 variations and respiration types; (iii) ability to produce fermentation products; (iv) presence and  
29 absence of classical biochemical pathways in central metabolism; and (v) ability to produce key  
30 metabolic pathway intermediates in central metabolism which are precursors of essential  
31 biomass components of the cell.

32  
33 The Narrative associated with this work utilizes the core model reconstruction, gapfilling, and  
34 flux balance analysis (FBA) workflows in KBase. It also demonstrates the capacity of KBase to  
35 perform large-scale analyses. The authors used a *code cell* to programmatically run the model  
36 reconstruction, gapfilling, and FBA workflow on over 8000 genomes (Figure 1). Code cells make  
37 it possible to run any KBase App programmatically from within a Narrative. One can write a  
38 code cell in the Python programming language within a Narrative to run a single app or an entire  
39 pipeline of apps. While code cells require knowledge of Python programming to write, Narratives  
40 with useful code cells can be shared with any user, who can re-run the code cells with ease.  
41 This work also inspired the addition of a new batch app for model reconstruction called *Build*

42 *Multiple Metabolic Models*. With this new app, it is no longer necessary to use a code cell to  
43 build thousands of models. Such batch apps demonstrate a further mechanism beyond code  
44 cells through which the KBase platform can be used to conduct large studies. To download the  
45 8000+ models from KBase in SBML form, the authors used the *Bulk Download Modeling*  
46 *Objects* app, which permits bulk download of any supported type modeling object.

## 47 **1B. Identifying Violacein Synthesis Genes in a New Isolate Genome**

48 Link: <https://narrative.kbase.us/narrative/ws.21546.obj.1>

49  
50 With its many apps for microbial genome assembly and annotation, KBase is an ideal platform  
51 for the analysis of new isolate genomes. This is demonstrated in a recent *Genome*  
52 *Announcement* publication by Romy Chakraborty and colleagues<sup>2</sup>. In this study, groundwater  
53 samples from the ORNL FRC site were collected from multiple wells, where researchers  
54 identified a *Janthinobacterium* isolate that produces violacein. Violacein is a naturally-occurring  
55 bis-indole pigment with antibiotic (antibacterial, anti-fungal and anti-tumor) properties. The  
56 Chakraborty team loaded their isolate reads into KBase, performing QC and assembly. They  
57 next applied both the Prokka<sup>3</sup> and RAST<sup>4</sup> annotation tools to the assembled genome, with  
58 Prokka calling 5531 genes, while RAST called 5998. They also ran OrthoMCL<sup>5</sup> to compare the  
59 two alternative annotations side by side. From this analysis, the researchers determined that  
60 both RAST and Prokka properly annotated 4 out of 5 genes in the violacein biosynthesis  
61 pathway. However, these algorithms differed in the specific violacein gene they missed. RAST  
62 missed VioC, while Prokka missed VioE. By combining both sets of annotations, the  
63 researchers were able to identify and confirm the presence of all violacein genes in their isolate  
64 of interest. The Chakraborty team's analysis is captured in the linked Narrative, including their  
65 thought process at each step. This study demonstrates the value of having multiple apps for  
66 some of the key steps of the isolate analysis pipeline. During genome assembly and genome  
67 annotation, the researchers were able to apply multiple algorithms, evaluating and comparing  
68 the results, and selecting the best-performing algorithm for each step.

## 69 **1C. Predicting Trophic Interactions Within a Microbial Community**

70 Narrative 1: <https://narrative.kbase.us/narrative/ws.13807.obj.1>

71 Narrative 2: <https://narrative.kbase.us/narrative/ws.13806.obj.1>

72 Narrative 3: <https://narrative.kbase.us/narrative/ws.13838.obj.1>

73  
74 KBase enables researchers to study interactions between multiple species in a microbial  
75 community. In three interconnected Narratives associated with a recent cover article in the  
76 *Journal of Cellular Physiology*<sup>6</sup>, the authors applied KBase to construct new metabolic models  
77 for a photoautotroph, *Thermosynechococcus elongatus* BP1, and a heterotroph, *Meiothermus*  
78 *ruber* strain A. They used these models to predict trophic interactions between species,  
79 exploring a wide range of potential methods for predicting these interactions. The authors  
80 utilized metatranscriptomic data to validate predictions and identify which prediction method  
81 performed the best (see Figure 2).

82  
83 These Narratives collectively demonstrate a large fraction of the capabilities presently available  
84 in KBase, including: (i) proteome comparison; (ii) building species trees; (iii) annotating a  
85 genome; (iv) building and gapfilling a modeling; (v) propagating a model; (vi) loading expression  
86 data; (v) building a community metabolic model; (vi) running flux balance analysis; (vii)  
87 comparing flux with expression data (Figure 2); and (viii) using code cells to sift data from  
88 objects in the KBase workspace. In this case, the code cell is used to print out the trophic  
89 interactions among species in a community model based on the flux profile generated by the  
90 FBA app.

91

## 92 **1D. Modeling Metabolic Interactions Between Cyanobacteria-** 93 **Sphagnum**

94 Link: <https://narrative.kbase.us/narrative/ws.9667.obj.2>

95

96 KBase has tools and datasets that are useful for analyzing plant metabolism and plant/microbe  
97 interactions. In a study published in *Plant, Cell & Environment*<sup>7</sup>, researchers explored a mutually  
98 beneficial metabolic partnership between a moss and a bacterium, using KBase data and tools  
99 to build a merged community metabolic model in which a nitrogen-fixing diazotrophic microbe  
100 (*Anabena*) fixes nitrogen to allow a plant (*Sphagnum*) to grow. *Sphagnum* (peat moss), a genus  
101 of plants (Bryophyta) that associate with nitrogen-fixing diazotrophs is a quintessential  
102 ecosystem engineer. All the analysis steps were performed in KBase, culminating with merging  
103 the two models into a community model which exhibits nitrogen fixation and exchange, showing  
104 that the plant portion of the model consumes the nitrogen fixed by the microbial portion of the  
105 model, and predicting that the *Sphagnum* will grow more when utilizing nitrogen fixed by the  
106 microbe than when fixing nitrates on its own.

107

108 This Narrative demonstrates the plant reference genomes in KBase, as well as the plant model  
109 reconstruction pipeline. It also shows how models of any type (for example, microbial and plant  
110 models) can be merged together to form a community model.

## 111 **1E. Sharing Workflows Easily with Collaborators and the General** 112 **Public**

113 Link 1: <https://narrative.kbase.us/narrative/ws.18152.obj.1>

114 Link 2: <https://narrative.kbase.us/narrative/ws.18153.obj.1>

115 Link 3: <https://narrative.kbase.us/narrative/ws.18155.obj.1>

116 Link 4: <https://narrative.kbase.us/narrative/ws.18156.obj.1>

117 Link 5: <https://narrative.kbase.us/narrative/ws.18157.obj.1>

118

119 These Narratives were specifically crafted to demonstrate how the KBase platform can facilitate  
120 interaction, data sharing, and collaboration between two scientists working on a common  
121 problem. The ability to share data, results, and workflows is extremely important and more or  
122 less a requirement in collaborative studies<sup>8</sup>. KBase facilitates copying and sharing of

123 collaborative data, workflows and related commentary. A user can share any Narrative that they  
124 own with other KBase users or make it publically available. Importantly, when a user shares a  
125 Narrative, they also are sharing all the data objects loaded, used, or generated within the  
126 Narrative, complete with versioning and provenance. Copying and sharing are performed in a  
127 controlled manner where users with read privileges for a Narrative can create their own copy,  
128 which they own and can edit. Users are able to quickly replicate and expand on any KBase  
129 Narrative shared with them. This approach facilitates reproducible interdisciplinary science by  
130 allowing researchers with different expertise to quickly and easily exchange data, results,  
131 methodologies, and workflows to address complex biological problems.

132  
133 We demonstrate collaborative sharing of data, commentary (notes) and workflows in KBase  
134 using a series of example Narratives (Figure 3) featuring two hypothetical scientists: Alice, an  
135 experimental biologist with expertise in assembly, annotation, and comparative genomics, and  
136 Bob, a computational biologist with expertise in metabolic modeling.

137  
138 Alice the experimentalist uploads raw reads that she has sequenced from a strain of  
139 *Shewanella* on which she wants to perform comparative genomic analysis in order to  
140 understand the similarities and unique features compared to phylogenetically closely related  
141 genomes. She uploads sequencing reads to KBase and then assembles and annotates the  
142 reads generating an annotated genome (Alice assembly and annotation Narrative:  
143 <https://narrative.kbase.us/narrative/ws.18152.obj.1>). In a separate Narrative (Alice Comparative  
144 Genomics Narrative: <https://narrative.kbase.us/narrative/ws.18153.obj.1>), Alice identifies  
145 genomes that are phylogenetically close to her *Shewanella* strain. She also finds growth  
146 phenotype data for *Shewanella oneidensis* MR-1, which is phylogenetically close to her strain.  
147 This inspires Alice to perform a growth phenotype array on her own strain. Alice then compares  
148 phenotype arrays of her own strain vs *S.oneidensis* MR-1 and notices many differences that she  
149 cannot explain.

150  
151 In order to understand more about Biolog phenotype data, Alice contacts Bob the modeler who  
152 is able to analyze the metabolic differences between the two strains, which in turn helps Alice to  
153 interpret the Biolog phenotype data. Alice shares her Narratives with Bob, which allows Bob to  
154 copy her genomes into a new Narrative. In this Narrative (Bob build metabolic models Narrative:  
155 <https://narrative.kbase.us/narrative/ws.18155.obj.1>) Bob loads a published model of *S.*  
156 *oneidensis* MR-1, which he then propagates to Alice's genome, producing a high quality  
157 metabolic model using the published model as a template. Bob compares the two models,  
158 identifying some interesting metabolic differences. Then Bob creates a separate Narrative (Bob  
159 and Alice shared Narrative of Phenotype Data Analysis:  
160 <https://narrative.kbase.us/narrative/ws.18156.obj.1>) in which he imports Alice's Biolog data and  
161 simulates the data with his *Shewanella* models. He optimizes his models to fit the Biolog data  
162 and shares the results with Alice. Finally, the two scientists build another shared Narrative (Bob  
163 and Alice shared Narrative of Phenotype Data Reconciliation:  
164 <https://narrative.kbase.us/narrative/ws.18157.obj.1>) in which Alice improves the quality of Bob's  
165 models by curating the models further by replacing some of the gapfilled reactions with more

166 biologically meaningful selections, gaining a complete understanding of the differences between  
167 her strain and MR-1.

168  
169 This example demonstrates how KBase can facilitate a collaborative study between  
170 scientists/groups with different but complementary expertise who are able to accomplish more  
171 together than they could individually. By saving their data, workflows along with commentary as  
172 Narratives, scientists who use KBase also enable other researchers to quickly reproduce their  
173 work with a minimum effort and also aid in further extending similar scientific research.

## 174 **Supplementary Note 2. Comparison of KBase with Other Online** 175 **Systems Biology Resources**

176 KBase has over 160 apps offering diverse scientific functionality for (meta)genome assembly,  
177 contig binning<sup>9</sup>, genome annotation<sup>10</sup>, sequence homology analysis<sup>5</sup>, tree building<sup>11</sup>,  
178 comparative genomics, metabolic modeling<sup>12</sup>, community modeling<sup>13</sup>, gap-filling<sup>14, 15</sup>, RNA-seq  
179 processing<sup>16</sup>, and expression analysis<sup>17</sup>. Apps in KBase interoperate seamlessly to enable a  
180 range of scientific workflows. Numerous tools exist today that are similar to KBase in that they  
181 offer web-based access to a variety of systems biology workflows. Five of the most similar and  
182 widely used tools are Galaxy<sup>18</sup>, CyVerse<sup>19</sup>, Pathway Tools<sup>20</sup>, BaseSpace  
183 (<http://basespace.illumina.com>) and GenePattern<sup>21</sup>. In order to highlight the ways in which  
184 KBase is different from each of these frameworks, we conducted a detailed comparison  
185 between KBase and these tools, focusing on the areas of functionality where KBase is most  
186 distinctive. Here we report on the results of our comparison, organizing our analysis into six  
187 fundamental areas: (a) user experience; (b) data model and provenance; (c) built in reference  
188 data; (d) sharing of data and workflows; (e) third-party development and custom code support;  
189 and (f) available scientific functionality.

### 190 **2A. Overview of All Compared Platforms**

191 We begin by providing some background on each of the resources selected for our comparison.  
192 The first framework we selected was Galaxy, which is a scientific workflow, data integration, and  
193 analysis platform that aims to make bioinformatics and computational biology workflows  
194 accessible to researchers without computer programming or systems administration experience.  
195 Like KBase, Galaxy is an open-source project. The project began in 2005, and it currently exists  
196 as a collaborative effort involving primarily Pennsylvania State University, Johns Hopkins  
197 University, and Oregon Health & Science University. Although Galaxy is available in many forms  
198 (described in detail at <https://galaxyproject.org/citing-galaxy/>), we focus our comparison on the  
199 version of Galaxy that most resembles KBase, which is the main public usegalaxy.org site.

200  
201 The second framework we selected for comparison was CyVerse. CyVerse was launched by  
202 NSF in 2008 initially as the iPlant Collaborative, but in 2013, its scope was extended to all non-  
203 human life sciences, with a renaming to CyVerse in 2016. The primary mission of CyVerse is to  
204 transform broader science through data discovery. While CyVerse offers customizable and  
205 programmatic interfaces, its two primary interfaces are a point and click web interface called the

206 Discovery Environment, and a cloud-hosted VM app based interface called Atmosphere. As with  
207 Galaxy, we will focus most of our comparison on the web-based Discovery Environment. The  
208 CyVerse Discovery Environment provides functionality to manage data, add new algorithms and  
209 tools, and run analyses on appropriate computational resources. It also provides access to  
210 storage (user's own, shared, and public data).

211  
212 The third framework we selected for comparison was the BaseSpace Sequence Hub.  
213 BaseSpace is a cloud-based, closed-source platform that provides tools to manage and analyze  
214 Illumina sequence data. Signing up for a free trial account allows users to store up to 1TB of  
215 sequence data for an indefinite period of time, as well as giving them a limited number of  
216 "compute credits". Many apps require "compute credits" to run, but free apps are also available.  
217 Like CyVerse and Galaxy, BaseSpace offers a web interface for storing and analyzing biological  
218 data, although this framework focuses primarily on sequencing data.

219  
220 The fourth framework we selected for comparison was GenePattern. GenePattern provides  
221 hundreds of analytical tools for gene expression (RNA-seq and microarray), sequence variation,  
222 proteomic data, flow cytometry, and network analysis. These tools are all made available  
223 through the online Gene Pattern Notebook environment with no programming experience  
224 required. Like KBase, this notebook environment extends the Jupyter Notebook<sup>22, 23</sup> system,  
225 allowing researchers to create documents that interleave formatted text, graphics and other  
226 multimedia, executable code, and GenePattern analyses. GenePattern was developed at the  
227 Broad Institute starting in 2006, and it is primarily funded by the National Cancer Institute.

228  
229 Given the extensive metabolic modeling tools available in KBase, we wanted to include a  
230 metabolic modeling framework in our comparison. For this, we chose Pathway Tools. Pathway  
231 Tools was developed as a means of curating and visualizing biochemical pathways and  
232 associated data for various organisms, dating all the way back to 1993. It is one of the longest  
233 lived software/database/web-server suites available. Pathway Tools supports the use of all  
234 known metabolism, in a wide taxonomical range, allowing users to create databases for  
235 bacteria, fungi, and plants. Pathway Tools integrates a web server, enabling laboratories to host  
236 their own instance of the database and publish their own data. Pathway Tools is somewhat  
237 different from the other frameworks selected for comparison in that most functionalities are only  
238 available offline through its installable software suite. Still, it is useful to include it in our  
239 comparison as it embodies many distinctive design patterns.

## 240 **2B. Comparison of User Experience**

241 KBase and all five of the platforms we selected for comparison offer a similar overall user  
242 experience. All platforms have a graphical user interface, which enables users to view data and  
243 run apps in point-and-click fashion. All platforms offer a centralized website from which users  
244 can access a canonical version of the platform. Galaxy, GenePattern, and Pathway Tools also  
245 offer a downloadable version, which can be installed and run on a user's own hardware. The  
246 KBase SDK also allows for this, but in a much less user-friendly and more limited manner.

247

248 KBase's Narrative Interface is distinct from any other analysis platforms available today,  
249 although it shares some common features with GenePattern<sup>21</sup>. KBase and GenePattern are  
250 both built on the Jupyter platform, allowing users to fashion multi-step analyses within online  
251 notebooks which they can then share. Both KBase and GenePattern extend Jupyter by offering  
252 users a point-and-click menu of apps that can be run within the Jupyter notebook. However,  
253 KBase is unique in also wrapping a data-layer around Jupyter, enabling users to browse and  
254 view data objects imported or generated by apps within the notebook. Pathway Tools, CyVerse,  
255 and BaseSpace are all app-centric interfaces with limited workflow support. Users select a  
256 single app, then select data to run the app on. Then the user views and shares the output of the  
257 analysis. Other point-and-click computational platforms do exist that enable users to  
258 dynamically construct workflows, including Taverna<sup>24</sup>, XSEDE<sup>25</sup>, myExperiment<sup>26</sup>, Kepler<sup>27</sup>,  
259 Pegasus<sup>28</sup>, and Globus<sup>29</sup>, but many of these platforms lack KBase's tight integration of tools and  
260 data, and none of these platforms offers the "story-telling" capacity of a Jupyter notebook-based  
261 interface.

262

263 Thus in the area of user experience, Galaxy and GenePattern are the most similar to KBase.

## 264 **2C. Comparison of Data Model**

265 Data model is one area where the platforms we selected for comparison vary the most. In our  
266 comparison, we found three distinct design patterns: (i) a file-based design (Galaxy, CyVerse,  
267 BaseSpace, GenePattern); (ii) a structured object-based design (KBase); and (iii) an entirely  
268 relational design (Pathway Tools).

269

270 Galaxy, CyVerse, GenePattern and BaseSpace all share very similar data frameworks in which  
271 all data is stored in the native file format uploaded by the user (e.g., FASTA, FASTQ, BAM). In  
272 these frameworks, the files are always augmented with associated metadata. This data model  
273 has several advantages: (i) upload and download are easy because there is no need to  
274 transform files into another form; (ii) sharing, provenance, and versioning are all easy because  
275 individual objects are self-contained and these features can operate on the level of each  
276 individual object; (iii) integration of files with tools is simple because tools typically operate on  
277 native file formats directly. However, this approach also has disadvantages: (i) files are only as  
278 consistent as their standards force them to be, and many files types (e.g., SBML, FASTA, GFF,  
279 GenBank) actually involve extensive variability in how they represent data; (ii) there are often  
280 many different file formats representing a single entity (e.g., FASTQ, FASTA, SRA for reads),  
281 meaning many file format conversion utilities are required and the user spends significant time  
282 transforming file formats; (iii) complex files (e.g., GenBank, FASTQ, SRA) are often treated as  
283 black boxes, meaning they lack introspection and the files are not indexed in detail; and (iv) the  
284 data that can be stored in a data type is limited by what is accommodated by its associated file  
285 formats (e.g., in COBRA, extensive data is stashed in the typed object used to represent a  
286 model, but when that typed object is converted to SBML, some of that data is lost due to  
287 limitations in the SBML file format).

288

289 The KBase data model is similar to the file-based data model in that it is also object-based. This  
290 means the KBase data model shares the largest benefit of the file-based system, which is that  
291 individual objects are self-contained and can be independently shared, versioned, and  
292 provenanced. However, instead of representing objects in their original file formats, KBase  
293 represents objects in a single standardized, typed, rigorously specified, versioned, and validated  
294 JSON-based format. The downside of this approach is that all uploaded and downloaded files  
295 must be converted to and from their associated KBase object type, which makes supporting  
296 upload and download a challenge for tool developers (the conversion process is transparent  
297 and thus has very limited impact on end-users). This conversion can be lossy if the input file and  
298 output data-type are not completely synchronized. This also makes tool integration more of a  
299 challenge, as the tool developers must add some additional code to handle the conversion to  
300 and from any KBase data type that their tool operates against. A developer may also need to  
301 add a new data type if the output of the tool must be persistent (and reused) and the type  
302 doesn't already exist. However, this approach eliminates nearly all the downsides of a file-based  
303 system: (i) types are totally standardized and consistent even if their associated files are not; (ii)  
304 there is only one representation for each fundamental type (e.g., "reads" vs SRA, FASTQ,  
305 FASTA); (iii) types can be summarized, viewed, introspected and interconnected, although this  
306 still isn't as easy and performant as a fully relational data model; and (iv) data types can be  
307 rapidly expanded as required to meet the demands of new analyses being added to the  
308 framework (e.g., adding atom mappings to metabolic models).

309  
310 The data model in Pathway Tools is completely distinct from the other platforms, maintaining  
311 data internally within a relational database, while using primarily custom flat-file-formats that are  
312 specific to Pathway Tools for data exchange. This has the advantage of maintaining data in a  
313 highly interconnected and queryable format within the Pathway Tools framework. Introspection,  
314 search, standardization, and internal consistency are all great strengths of this approach.  
315 However, this comes at the cost of granularity in support for versioning, sharing, and  
316 provenance in Pathway Tools.

## 317 **2D. Comparison of Provenance, Data Sharing, and Data Versioning**

318 Our data model comparison reveals how the provenance, data sharing, and data versioning  
319 features of our selected frameworks depend significantly on the data model of the framework.  
320 Galaxy, CyVerse, BaseSpace, GenePattern and KBase, all of which have file-based or object-  
321 based data models, have similar support for provenance and sharing. All of these frameworks  
322 maintain information about the input parameters and apps used to produce each object stored  
323 in the system (limited in the case of GenePattern). All of these frameworks also support sharing  
324 at the level of individual objects. However, this always involves copying objects into "libraries"  
325 (Galaxy), "folders" (CyVerse), "projects" (BaseSpace), "notebooks" (GenePattern), or  
326 "Narratives" (KBase) and sharing those containers with other users. Galaxy, CyVerse,  
327 BaseSpace, GenePattern, and KBase do vary in how they handle versioning. Only KBase  
328 maintains an explicit version number of every overwritten object, and only KBase allows an  
329 overwritten object to be reverted to a previous version. BaseSpace and GenePattern do not  
330 support data versioning, instead relying on users not to overwrite data that they want to keep



331 (although this can result in loss of the data needed to repeat a particular downstream result).  
332 CyVerse and Galaxy follow a very different approach in that objects are namespaced and  
333 timestamped according to the workflow and the previous objects from which they were derived.  
334 Thus, it is essentially impossible to overwrite an object, and all versions of all data are  
335 preserved unless explicitly deleted by the user.

336  
337 In this area, Pathway Tools is quite different from the other frameworks, which is not surprising  
338 given its very different data model. Versioning in Pathway Tools only occurs at the level of an  
339 entire PathwayDB, and sharing is only supported by exporting data into files, which can then be  
340 shared offline and imported elsewhere. Pathway Tools only preserves provenance in the  
341 annotations and curations made to its underlying relational database, although in this case,  
342 provenance can be maintained with a granularity and detail that exceeds the other systems  
343 discussed.

## 344 **2E. Comparison of Built-in Reference Data**

345 Reference data is another area where KBase stands out among the platforms we selected for  
346 comparison. Reference data is vital in that it serves to place user data and analysis results into  
347 the broader context of all other known data of the same type. It is often more useful to  
348 understand how a genome is different from its phylogenetically close neighbors than to  
349 understand every single detail of the genome itself.

350  
351 Among all our platforms selected for comparison, only KBase and Pathway Tools offer their own  
352 internally managed, organized, and curated reference data collections. KBase offers a reference  
353 database of over 90K microbial and eukaryotic genomes maintained and periodically  
354 synchronized with RefSeq and Phytozome. To facilitate comparison, all of the microbial  
355 genomes have been annotated using the RAST genome annotation app in KBase. KBase also  
356 offers a reference database of biochemistry, including 27K compounds, 34K reactions, and 522  
357 media formulations. The reference genomes in KBase are readily available for copying into any  
358 KBase Narrative for analysis and comparison, but they also form the basis for some apps that  
359 analyze user data in the context of this reference data (e.g., the *Insert Genomes into Species*  
360 *Tree* app). The reference biochemistry in KBase forms the basis for the metabolic model  
361 reconstruction, standardization, and gapfilling tools in KBase.

362  
363 Pathway Tools offers ready access to a database of 9318 Pathway Genome Databases, each  
364 of which represents a single genome, a metabolic reconstruction, and a basic model. Pathway  
365 Tools also deeply integrates a reference biochemistry database comprised of 14K reactions and  
366 13K compounds. Even more than KBase, this reference data in Pathway Tools is at the core of  
367 every analysis a user does in the platform.

368  
369 While Galaxy, GenePattern, CyVerse, and BaseSpace do not presently have their own  
370 internally managed and organized reference data, it is important to note that: (i) all four of these  
371 platforms include apps that facilitate the download of reference data from other existing  
372 databases (e.g., NCBI); (ii) all four have public data available for download and access to

373 varying degree (e.g., CyVerse has a large and diverse *data commons* while BaseSpace has  
374 example datasets); and (iii) many apps integrated into these platforms maintain their own  
375 sizable reference databases. This last point is critical, and in fact, provides one reason why  
376 maintaining an internal reference database is useful. Users will run many different apps on their  
377 data, which internally may utilize their own wide range of internal reference data. Problems may  
378 arise when mixing and matching apps that rely on different and inconsistent reference data.

379  
380 Overall, KBase stands out in this category for its breadth of genomic and biochemical reference  
381 data.

## 382 **2F. Comparison of Third-party Development and Custom Code** 383 **Support**

384 In terms of support for third-party development, KBase, BaseSpace, GenePattern, CyVerse,  
385 and Galaxy all offer a similar experience, while Pathway Tools is quite different. In large part,  
386 this is due to the fact that KBase, BaseSpace, GenePattern, CyVerse, and Galaxy were all  
387 designed in part to serve as platforms for the deployment of third-party apps. All of these  
388 platforms have their own equivalent of an app catalog (called the Discovery Environment in  
389 CyVerse and the ToolShed in Galaxy). These app catalogs enable users to discover apps, read  
390 documentation related to the apps, rate the apps, and view apps created and shared by other  
391 users. All of these platforms offer an SDK of some form, and use virtualization technology to  
392 simplify deployment (Galaxy, CyVerse, and BaseSpace use Docker just like KBase does).  
393 Galaxy, KBase, CyVerse, GenePattern, and BaseSpace enable users to create their own  
394 custom UIs for their apps using general spec files encoded in either XML (Galaxy) or JSON  
395 (KBase, CyVerse, BaseSpace). The complexity associated with the addition of an app is roughly  
396 equivalent in all five platforms. The object-based data model in KBase does create added  
397 complexity for developers as they need to convert between objects and files when wrapping a  
398 tool, but conversely, these developers also often benefit from the greater standardization of  
399 objects fed into their tool on KBase. Galaxy has a lower learning curve and simpler app  
400 development process, but app registration system-wide is more difficult. CyVerse, GenePattern,  
401 BaseSpace and KBase have steeper learning curves to create a new app, but KBase has the  
402 simplest interface for registering, sharing, and maintaining an app in the App Catalog.

403  
404 One unique aspect of the KBase SDK is the ease with which a developer can programmatically  
405 call any KBase app from within another app (e.g., the metabolic model reconstruction app can  
406 invoke the species tree building app internally to place a genome in a specific phylogenetic  
407 neighborhood). This capability will grow in power and importance as the number of apps  
408 available in the KBase app catalog increases.

409  
410 A second unique aspect of the KBase SDK is the support for binding in a wide range of  
411 programming languages, as well as the ability to construct a new module from a standard  
412 template in any of the same programming languages. CyVerse, GenePattern, BaseSpace, and  
413 Galaxy all offer only REST web services for interacting with the broader platforms (e.g.,  
414 accessing data).

415  
416 Pathway Tools also supports third party development, but in a much less formal, flexible, or  
417 automated fashion. Pathway Tools offers a LISP command interface, which exposes an API to  
418 access Pathway Tools data and run Pathway Tools applications interactively. Users can use  
419 this API to create new tools, and they can work with the Pathway Tools developers to get their  
420 tool integrated into the platform, but there is no way for a user to do this independently without  
421 interacting with core developers. Additionally, the tools must be written, at least in part, in LISP  
422 in order to interact with the rest of the Pathway Tools platform. KBase, CyVerse, BaseSpace,  
423 and Galaxy all offer language-agnostic REST or JSON RPC interfaces for platform interaction.

## 424 **2G. Comparison of Custom Code Support within Platform Workflows**

425 One key differentiator of KBase is that it's built on the Jupyter framework, so it enables users to  
426 seamlessly integrate IPython code cells into their workflows, either to run KBase apps in bulk, or  
427 to implement custom analysis steps that are not yet implemented within an app. Both of these  
428 capabilities are used to good effect in the exemplar Narratives described above. We explored in  
429 our comparison whether any other selected platforms offer a similar capability.

430  
431 GenePattern is the most similar platform to KBase in terms of this capability since it is also built  
432 on top of the Jupyter framework. GenePattern also allows seamless integration of custom code  
433 and Markdown cells into users' workflows, and GenePattern offers a programmatic interface for  
434 running apps in the platform.

435  
436 Neither CyVerse nor BaseSpace exhibit this capacity. The only way to integrate custom code  
437 into a workflow in these environments is to create a new app using the SDK. However, CyVerse  
438 does allow users to run local scripts in Shell, Perl, Python or R and run basic utilities based on  
439 these languages in the Discovery Environment for data/file processing. Users can write custom  
440 workflows using the LISP command interface in Pathway Tools, but rapidly sharing these  
441 custom workflows with others is difficult, as generally sharing workflows in Pathway Tools is not  
442 supported.

443  
444 Galaxy does not natively support the integration of custom code either. However, there are  
445 deploys of Galaxy available within Jupyter, where Python code can be used to run Galaxy apps  
446 within Jupyter code cells. This functionality is not nearly as integrated as the code cells in  
447 KBase, but it does offer a similar capability.

448  
449 Overall, a strong argument can be made that this important feature, at least in a fully integrated  
450 form, is unique to the KBase and GenePattern platforms. One of the challenges in using any  
451 online workflow system for scientific analysis is that virtually every scientific workflow is distinct  
452 (given the importance of novel discovery in science). Thus, it is very easy to run into a step in  
453 one's workflow for which no app conveniently exists in the platform one is using. When this  
454 happens, the user is forced to pull their data out of the platform they are using and load it into  
455 another environment where the needed analysis is available. This disrupts the continuity,  
456 provenance, and containment of the analysis. The analysis can no longer be shared as a single

457 self-contained entity for others to run. Thus, support for custom code is a truly important function  
458 for this type of platform, and it is distinct to KBase and GenePattern.

## 459 **2H. Comparison of Available Scientific Functionality**

460 Scientific functionality is one of the areas with the greatest variability among the platforms  
461 included in our comparison. Although there are plenty of examples of specific apps that are  
462 available in multiple platforms, no two platforms offered the same range of functionality, and all  
463 platforms had distinct areas of strength. Table 1 shows approximate support for different types  
464 of functionality in each platform. Note that this comparison focuses on functionality relating to  
465 the analysis of microbial and plant genomes, as this reflects the mission-space of KBase as a  
466 DOE resource.

467 The app functionality in KBase differs from existing systems in several ways. The seamless  
468 integration of code cells that KBase offers is distinctive, but not entirely unique--GenePattern<sup>21</sup>  
469 and Synapse offer a similar capability. Galaxy<sup>18</sup>, Taverna<sup>24</sup>, CyVerse<sup>19</sup>, XSEDE<sup>25</sup>,  
470 myExperiment<sup>26</sup>, and GenePattern<sup>21</sup> overlap with many of the bioinformatics workflows in KBase  
471 but lack the metabolic modeling capabilities. COBRA Toolbox<sup>30</sup>, Pathway Tools<sup>31</sup>, and RAVEN  
472 Toolbox<sup>32</sup> support metabolic modeling but offer only minimal support for genome sequence  
473 analysis. In terms of science functionality, each platform has its own set of strengths and  
474 weaknesses. There are many categories where nearly all platforms have at least something to  
475 offer (although some have more than others). These include genome assembly, genome  
476 annotation, RNA-seq, comparative genomics, expression analysis, and assembly. However,  
477 among these categories, some platforms are clear gold standards in certain areas: CyVerse,  
478 GenePattern, and Galaxy for RNA-seq, variation, and comparative genomics; and KBase for  
479 assembly and annotation.

480  
481 Finally, there are areas of functionality that really distinguish between platforms because very  
482 few platforms offer any functionality at all. In metabolic modeling, only Pathway Tools and  
483 KBase offer functionality; in metagenome annotation, only CyVerse and Galaxy offer  
484 functionality; and in metabolomics and chemistry, only Galaxy offers functionality. Currently,  
485 KBase's capabilities for community model reconstruction, plant model reconstruction,  
486 community model gapfilling, and expression data model integration are completely unique to the  
487 KBase platform. Unsurprisingly, an examination of the app run counts in KBase reveals that the  
488 most runs are applied to the apps where KBase is strongest: annotation, modeling, and  
489 assembly

## 490 **2I. Summary of Platform Comparison**

491 Overall, from this comparison we see that KBase is extremely distinct from other bioinformatics  
492 and computational biology platforms that exist today. The data model is a key area of  
493 distinction: KBase uses biological types as objects, while most other platforms use files. While  
494 this makes file conversion more challenging for developers, it brings the benefit of generally  
495 making all tools much more interoperable and integrated, and requiring far fewer apps simply to  
496 convert data from one format to another. The KBase data model also permits introspection,

497 enabling viewers, summary statistics, dropdowns and search utilities that offer views of  
498 subobjects within an entity (reactions in a model, genes in a genome).

499 User experience is another key differentiator in KBase. With its integration on top of the Jupyter  
500 framework, KBase offers users the ability to run their analysis workflows within a notebook  
501 environment that also supports the seamless integration of custom text, graphics, and even  
502 executable code. Users can organize their apps, text, and graphics into rich, reproducible,  
503 scientific stories that may be shared and extended by others. Only GenePattern shares this  
504 capability with KBase, and GenePattern lacks the tight integration of data into this notebook  
505 environment that KBase offers.

506 Custom code support is another strength for KBase. KBase and GenePattern are the only  
507 platforms that offer this capacity natively within their primary interface. This capability is  
508 essential, as it enables a user to fill gaps in a workflow by writing custom code directly within the  
509 Narrative notebook. This enables a user to maintain the continuity of a Narrative as much as  
510 possible by avoiding the need to export data and analyze offline or in another platform in order  
511 to complete custom analyses. There is an enormous benefit to reproducibility if all work for a  
512 single complex study is performed in a single environment.

513 Reference data is also a key distinguishing component of the KBase platform. Only Pathway  
514 Tools and KBase maintain their own internal curated reference data. This data is crucial for  
515 placing user data into context. While other platforms do support reference data used by  
516 individual tools, there is great benefit in consolidating reference data for tools at much as  
517 possible to ensure that all tools are using a common reference data. The reference data in  
518 KBase is also instrumental to planned functionality like the Knowledge Engine.

519 Finally, scientific functionality is another key area of distinction for KBase. KBase offers diverse  
520 functionality that is nearly as broad as Galaxy (in terms of the number of categories of apps  
521 available) if not always as deep as Galaxy (in terms of the number of apps in each category).  
522 Additionally, there are some areas of functionality where KBase is a gold standard compared  
523 with the other platforms in our comparison, including genome assembly, annotation, and  
524 metabolic modeling.

525 This comparison focused on the most distinguishing features of the KBase platform, exploring  
526 how these features contrast with other platforms. As a result, this comparison ignores many  
527 important features that differentiate these other platforms from KBase. For example,  
528 BaseSpace, Galaxy, and CyVerse all excel at the annotation and analysis of human and other  
529 eukaryotic genome data. In contrast, the KBase user agreement explicitly prohibits the upload  
530 and analysis of human data in KBase. As a further example, Galaxy and Pathway Tools both  
531 excel at portability, meaning users can easily install and run their own instance of these  
532 systems. In contrast, platforms like KBase, GenePattern, and BaseSpace are fully centralized.

533

## 534 **Supplementary Note 3. Code and Data Availability**

### 535 **3A. Code Availability**

536 The KBase code, available at [github.com/kbase](https://github.com/kbase), is open source and freely distributed under the  
537 MIT License. The web-accessible KBase system ([narrative.kbase.us](https://narrative.kbase.us)) is run on DOE computing  
538 infrastructure and is freely available for anyone to use. KBase adheres to the FAIR (Findable,  
539 Accessible, Interoperable, Re-usable) data principles endorsed by many funding agencies and  
540 scientific organizations<sup>33</sup>  
541

### 542 **3B. Data Availability**

543 All data generated or analyzed during this study are included in this published article and  
544 Supplementary Note 1 as links to the original work, or in the associated KBase Narratives linked  
545 here. An earlier version of this paper was published as a preprint<sup>34</sup>.  
546

## 547 **Supplementary Figures**

548 **Supplementary Figure 1.** Code cell for batch processing. A custom code cell created within the  
549 Narrative Interface that constructs CMMs for thousands of genomes.

```
Construction of Core Metabolic Models in Bulk using a Code Cell # Janaka
import time
import pprint
import json
import sys
from biobase.narrative.jobs.appmanager import AppManager
version = "release"

#Construction of Core Metabolic Models in Bulk using a Code Cell # Janaka Edirisinghe v.01 03/16/2017

ws = biobase.narrative.clients.get("workspace")

my_list = ws.list_objects({'ids':['358'],'type':'KBaseGenomes.Genome','minObjectID':0,'maxObjectID':50
count = 0
for genome in my_list:
    #print 'Genome :', genome[1]
    count += 1
    if count < 501:
        #print 'Now processing genome id :', genome[1]

    print 'Starting Core Metabolic construction for the genome ',genome[1]
    genome_ob = ws.copy_object({'from':{'objid':genome[0],'wsid': 358},'to':{'wsid': 20186,'name':
```

550

551

552 **Supplementary Figure 2.** “Compare Flux with Expression” output. Bar chart produced by the [“Compare](#)  
 553 [Flux with Expression” app](#) in KBase, which evaluates the reconciliation of metabolic model predictions  
 554 against expression data. All of the data points are categorized into biochemical pathways.

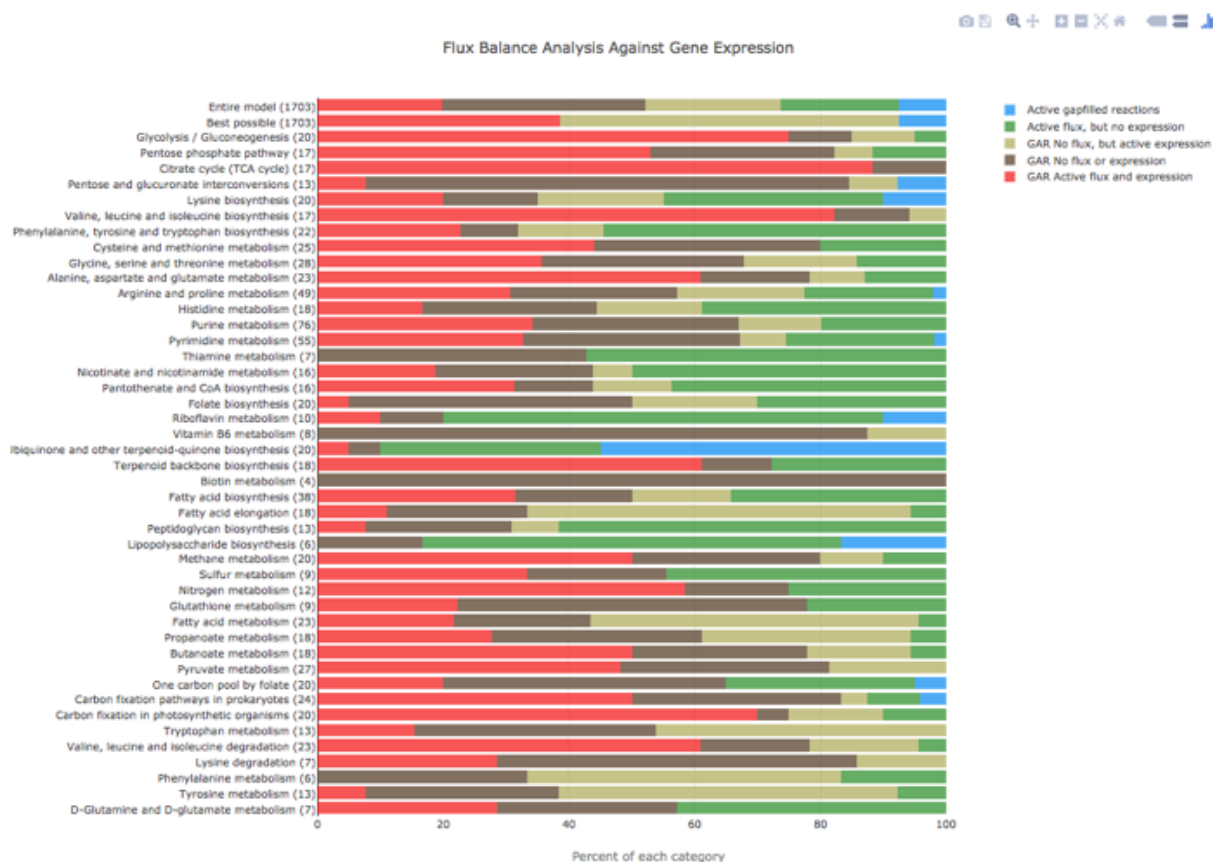

555  
 556

557 **Supplementary Figure 3.** Sharing of data, commentary and workflows using KBase Narratives. Two  
 558 researchers (Alice and Bob) create analysis workflows that complement each other’s research resulting in  
 559 more intuitive and complete scientific conclusions.  
 560

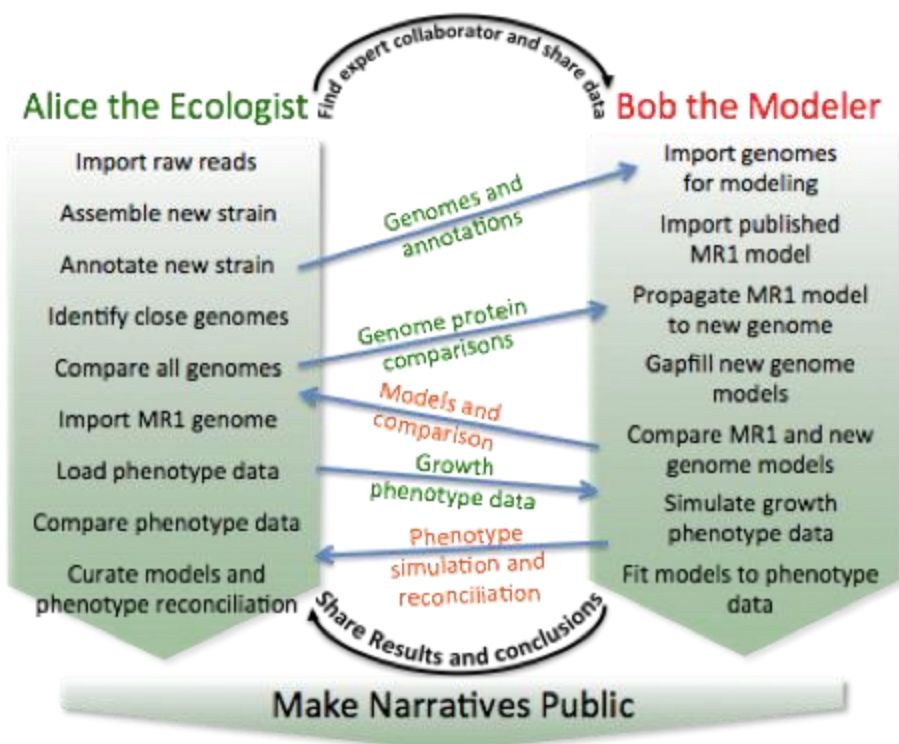

561  
562

## 563 Supplementary Tables

564  
565

**Supplementary Table 1.** Comparison of functionality available across evaluated platforms

| Category                                      | KBase  | CyVerse | BaseSpace | Galaxy | GenePattern | Pathway Tools |
|-----------------------------------------------|--------|---------|-----------|--------|-------------|---------------|
| <b>Genome assembly</b>                        | High   | Medium  | Low       | Medium | None        | None          |
| <b>Microbial genome annotation</b>            | High   | Medium  | Low       | Low    | Low         | Low           |
| <b>Metagenome assembly and contig binning</b> | Medium | Medium  | None      | Low    | None        | None          |
| <b>Metagenome annotation</b>                  | None   | Medium  | None      | Medium | None        | None          |
| <b>Variation and GWAS</b>                     | None   | High    | Medium    | High   | High        | None          |



|                                         |        |      |      |        |      |      |
|-----------------------------------------|--------|------|------|--------|------|------|
| <b>RNA-seq</b>                          | Medium | High | Low  | High   | High | None |
| <b>Metabolic modeling and chemistry</b> | High   | None | None | None   | Low  | High |
| <b>Metabolomics and chemistry</b>       | Low    | None | None | Medium | None | Low  |
| <b>Comparative genomics</b>             | Low    | High | Low  | High   | Low  | Low  |
| <b>Expression analysis</b>              | Low    | Low  | Low  | High   | High | Low  |

566

567 **Supplementary References**

568

- 569 1. Edirisinghe, J.N. et al. Modeling central metabolism and energy biosynthesis across  
570 microbial life. *BMC Genomics* **17**, 568 (2016).
- 571 2. Wu, X. et al. Draft Genome Sequences of Two *Janthinobacterium lividum* Strains,  
572 Isolated from Pristine Groundwater Collected from the Oak Ridge Field Research  
573 Center. *Genome Announc* **5** (2017).
- 574 3. Seemann, T. Prokka: rapid prokaryotic genome annotation. *Bioinformatics* **30**, 2068-  
575 2069 (2014).
- 576 4. Brettin, T. et al. RASTtk: a modular and extensible implementation of the RAST  
577 algorithm for building custom annotation pipelines and annotating batches of genomes.  
578 *Sci Rep* **5**, 8365 (2015).
- 579 5. Li, L., Stoeckert, C.J., Jr. & Roos, D.S. OrthoMCL: identification of ortholog groups for  
580 eukaryotic genomes. *Genome Res* **13**, 2178-2189 (2003).
- 581 6. Henry, C.S. et al. Microbial community metabolic modeling: A community data-driven  
582 network reconstruction. *J Cell Physiol* (2016).
- 583 7. Weston, D.J. et al. Sphagnum physiology in the context of changing climate: emergent  
584 influences of genomics, modelling and host-microbiome interactions on understanding  
585 ecosystem function. *Plant Cell Environ* **38**, 1737-1751 (2015).
- 586 8. Wilkinson, M.D. et al. The FAIR Guiding Principles for scientific data management and  
587 stewardship. *Sci Data* **3**, 160018 (2016).
- 588 9. Wu, Y.W., Tang, Y.H., Tringe, S.G., Simmons, B.A. & Singer, S.W. MaxBin: an  
589 automated binning method to recover individual genomes from metagenomes using an  
590 expectation-maximization algorithm. *Microbiome* **2**, 26 (2014).
- 591 10. Aziz, R.K. et al. The RAST Server: rapid annotations using subsystems technology.  
592 *BMC Genomics* **9**, 75 (2008).
- 593 11. Price, M.N., Dehal, P.S. & Arkin, A.P. FastTree 2--approximately maximum-likelihood  
594 trees for large alignments. *PLoS One* **5**, e9490 (2010).
- 595 12. Henry, C.S. et al. High-throughput generation, optimization, and analysis of genome-  
596 scale metabolic models. *Nature Biotechnology* **Nbt.1672**, 1-6 (2010).

- 597 13. Faria, J.P. et al. Constructing and Analyzing Metabolic Flux Models of Microbial  
598 Communities. *Hydrocarbon and Lipid Microbiology Protocols* (2016).
- 599 14. Latendresse, M. Efficiently gap-filling reaction networks. *BMC Bioinformatics* **15**, 225  
600 (2014).
- 601 15. Dreyfuss, J.M. et al. Reconstruction and validation of a genome-scale metabolic model  
602 for the filamentous fungus *Neurospora crassa* using FARM. *PLoS Comput Biol* **9**,  
603 e1003126 (2013).
- 604 16. Ghosh, S. & Chan, C.K. Analysis of RNA-Seq Data Using TopHat and Cufflinks.  
605 *Methods Mol Biol* **1374**, 339-361 (2016).
- 606 17. Faria, J.P. et al. Computing and Applying Atomic Regulons to Understand Gene  
607 Expression and Regulation. *Front Microbiol* **7**, 1819 (2016).
- 608 18. Goecks, J., Nekrutenko, A., Taylor, J. & Team, G. Galaxy: a comprehensive approach  
609 for supporting accessible, reproducible, and transparent computational research in the  
610 life sciences. *Genome Biology* **11** (2010).
- 611 19. Goff, S.A. et al. The iPlant Collaborative: Cyberinfrastructure for Plant Biology. *Front*  
612 *Plant Sci* **2**, 34 (2011).
- 613 20. Karp, P.D. et al. Pathway Tools version 19.0 update: software for pathway/genome  
614 informatics and systems biology. *Brief Bioinform* **17**, 877-890 (2016).
- 615 21. Reich, M. et al. GenePattern 2.0. *Nat Genet* **38**, 500-501 (2006).
- 616 22. Perez, F. & Granger, B.E. IPython: A system for interactive scientific computing.  
617 *Computing in Science & Engineering* **9**, 21-29 (2007).
- 618 23. Kluyver, T. et al. Jupyter Notebooks—a publishing format for reproducible computational  
619 workflows. *Positioning and Power in Academic Publishing: Players, Agents and*  
620 *Agendas*, 87-90 (2016).
- 621 24. Oinn, T. et al. Taverna: a tool for the composition and enactment of bioinformatics  
622 workflows. *Bioinformatics* **20**, 3045-3054 (2004).
- 623 25. Towns, J. et al. XSEDE: Accelerating Scientific Discovery. *Computing in Science &*  
624 *Engineering* **16**, 62-74 (2014).
- 625 26. Goble, C.A. et al. myExperiment: a repository and social network for the sharing of  
626 bioinformatics workflows. *Nucleic Acids Research* **38**, W677-W682 (2010).
- 627 27. Altintas, I. et al. Kepler: An extensible system for design and execution of scientific  
628 workflows. *16th International Conference on Scientific and Statistical Database*  
629 *Management, Proceedings*, 423-424 (2004).
- 630 28. Deelman, E. et al. Pegasus: A framework for mapping complex scientific workflows onto  
631 distributed systems. *Sci Programming-Neth* **13**, 219-237 (2005).
- 632 29. Ananthkrishnan, R., Chard, K., Foster, I. & Tuecke, S. Globus platform-as-a-service for  
633 collaborative science applications. *Concurrency and Computation-Practice & Experience*  
634 **27**, 290-305 (2015).
- 635 30. Schellenberger, J. et al. Quantitative prediction of cellular metabolism with constraint-  
636 based models: the COBRA Toolbox v2.0. *Nat Protoc* **6**, 1290-1307 (2011).
- 637 31. Karp, P.D. et al. The EcoCyc and MetaCyc databases. *Nucleic Acids Research* **28**, 56-  
638 59 (2000).
- 639 32. Agren, R. et al. The RAVEN toolbox and its use for generating a genome-scale  
640 metabolic model for *Penicillium chrysogenum*. *PLoS Comput Biol* **9**, e1002980 (2013).
- 641 33. Wilkinson, M.D. et al. The FAIR Guiding Principles for scientific data management and  
642 stewardship. *Sci Data* **3**, 160018 (2016)
- 643 34. Arkin, A.P. et al. The DOE Systems Biology Knowledgebase (KBase). *bioRxiv preprint*  
644 **first posted online Dec. 22, 2016** (2016).
- 645
