# Supplementary material for: KBase: The United States Department of Energy Systems Biology Knowledgebase
Source: PubMed Central journal article supplement (PMC6870991; doi:10.1038/nbt.4163), 2018-07-06
Supplement: 41587_2018_BFnbt4163_MOESM13_ESM.pdf [file 41587_2018_BFnbt4163_MOESM13_ESM.pdf]

## Life Sciences Reporting Summary

Nature Research wishes to improve the reproducibility of the work that we publish. This form is intended for publication with all accepted life science papers and provides structure for consistency and transparency in reporting. Every life science submission will use this form; some list items might not apply to an individual manuscript, but all fields must be completed for clarity.

For further information on the points included in this form, see [Reporting Life Sciences Research](#). For further information on Nature Research policies, including our [data availability policy](#), see [Authors & Referees](#) and the [Editorial Policy Checklist](#).

### ▶ Experimental design

#### 1. Sample size

Describe how sample size was determined.

KBase does not involve samples.

#### 2. Data exclusions

Describe any data exclusions.

There were no explicit data exclusions.

#### 3. Replication

Describe whether the experimental findings were reliably reproduced.

The scientific analyses produced in KBase can be readily reproduced by others -- that is one of the key aspects of KBase's Narrative Interface.

#### 4. Randomization

Describe how samples/organisms/participants were allocated into experimental groups.

KBase does not involve samples/organisms/participants.

#### 5. Blinding

Describe whether the investigators were blinded to group allocation during data collection and/or analysis.

KBase does not involve this type of analysis.

Note: all studies involving animals and/or human research participants must disclose whether blinding and randomization were used.

#### 6. Statistical parameters

For all figures and tables that use statistical methods, confirm that the following items are present in relevant figure legends (or in the Methods section if additional space is needed).

- |                                     |                                                                                                                                                                                                                               |
|-------------------------------------|-------------------------------------------------------------------------------------------------------------------------------------------------------------------------------------------------------------------------------|
| n/a                                 | Confirmed                                                                                                                                                                                                                     |
| <input checked="" type="checkbox"/> | <input type="checkbox"/> The <u>exact sample size</u> ( <i>n</i> ) for each experimental group/condition, given as a discrete number and unit of measurement (animals, litters, cultures, etc.)                               |
| <input checked="" type="checkbox"/> | <input type="checkbox"/> A description of how samples were collected, noting whether measurements were taken from distinct samples or whether the same sample was measured repeatedly                                         |
| <input checked="" type="checkbox"/> | <input type="checkbox"/> A statement indicating how many times each experiment was replicated                                                                                                                                 |
| <input checked="" type="checkbox"/> | <input type="checkbox"/> The statistical test(s) used and whether they are one- or two-sided (note: only common tests should be described solely by name; more complex techniques should be described in the Methods section) |
| <input checked="" type="checkbox"/> | <input type="checkbox"/> A description of any assumptions or corrections, such as an adjustment for multiple comparisons                                                                                                      |
| <input checked="" type="checkbox"/> | <input type="checkbox"/> The test results (e.g. <i>P</i> values) given as exact values whenever possible and with confidence intervals noted                                                                                  |
| <input checked="" type="checkbox"/> | <input type="checkbox"/> A clear description of statistics including <u>central tendency</u> (e.g. median, mean) and <u>variation</u> (e.g. standard deviation, interquartile range)                                          |
| <input checked="" type="checkbox"/> | <input type="checkbox"/> Clearly defined error bars                                                                                                                                                                           |

See the web collection on [statistics for biologists](#) for further resources and guidance.

## ► Software

Policy information about [availability of computer code](#)

### 7. Software

Describe the software used to analyze the data in this study.

This study describes the KBase platform, which is an open source, freely accessible, web-based software system.

For manuscripts utilizing custom algorithms or software that are central to the paper but not yet described in the published literature, software must be made available to editors and reviewers upon request. We strongly encourage code deposition in a community repository (e.g. GitHub). *Nature Methods* [guidance for providing algorithms and software for publication](#) provides further information on this topic.

## ► Materials and reagents

Policy information about [availability of materials](#)

### 8. Materials availability

Indicate whether there are restrictions on availability of unique materials or if these materials are only available for distribution by a for-profit company.

KBase is a software platform and doesn't involve materials or reagents.

### 9. Antibodies

Describe the antibodies used and how they were validated for use in the system under study (i.e. assay and species).

KBase is a software platform and doesn't involve antibodies.

### 10. Eukaryotic cell lines

a. State the source of each eukaryotic cell line used.

KBase is a software platform and doesn't involve cell lines.

b. Describe the method of cell line authentication used.

KBase is a software platform and doesn't involve cell lines.

c. Report whether the cell lines were tested for mycoplasma contamination.

KBase is a software platform and doesn't involve cell lines.

d. If any of the cell lines used are listed in the database of commonly misidentified cell lines maintained by [ICLAC](#), provide a scientific rationale for their use.

KBase is a software platform and doesn't involve cell lines.

## ► Animals and human research participants

Policy information about [studies involving animals](#); when reporting animal research, follow the [ARRIVE guidelines](#)

### 11. Description of research animals

Provide details on animals and/or animal-derived materials used in the study.

KBase is a software platform and doesn't involve research animals.

Policy information about [studies involving human research participants](#)

### 12. Description of human research participants

Describe the covariate-relevant population characteristics of the human research participants.

KBase is a software platform and doesn't involve human research studies.
